# Supplementary material for: Protection by -Biotics against Hypertension Programmed by Maternal High Fructose Diet: Rectification of Dysregulated Expression of Short-Chain Fatty Acid Receptors in the Hypothalamic Paraventricular Nucleus of Adult Offspring
Source: MDPI journal article supplement (doi:10.3390/nu14204306), 2022-10-14
Supplement: s1 [file s1]

# Protection by -Biotics against Hypertension Programmed by Maternal High Fructose Diet: Rectification of Dysregulated Expression of Short-Chain Fatty acid Receptors in the Hypothalamic Paraventricular Nucleus of Adult Offspring

Yung Mei Chao, You Lin Tain, Wei-Chia Lee, Kay L.H. Wu, Hong-Ren Yu  
and Julie Y.H. Chan

Supplementary Figure S1: Oral supplements with –biotics have no significant effect on tissue ROS production and proinflammatory cytokines release in the PVN of ND offspring.

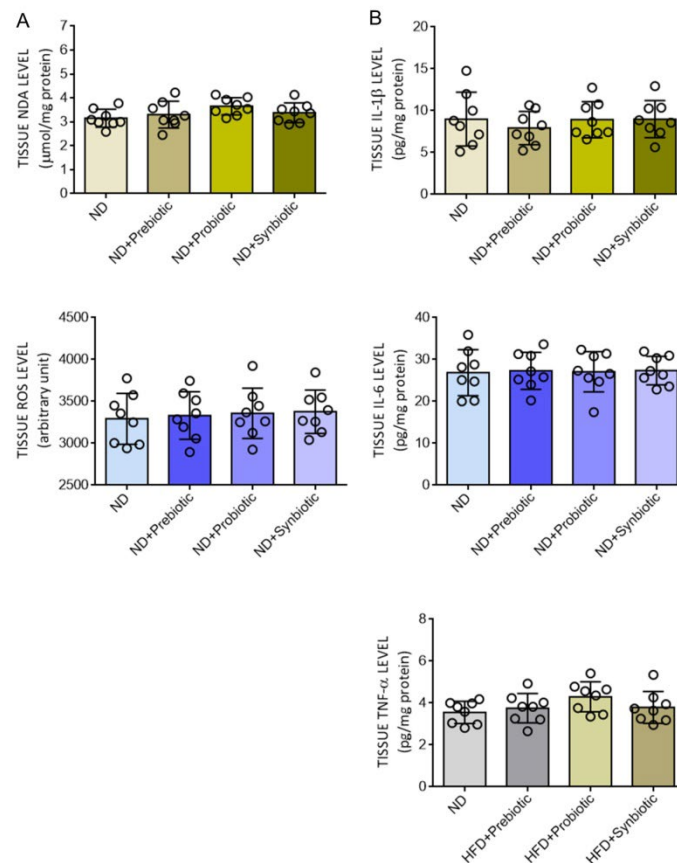

**Figure S1:** Tissue malondialdehyde (MDA) and reactive oxygen species (ROS) levels (A), and levels of proinflammatory cytokines interleukin 1-β (IL-1β), interleukin 6 (IL-6), and tumor necrosis factor α (TNF-α) (B) in the hypothalamic paraventricular nucleus (PVN) of adult ND offspring that received oral supplementation of FOS (4 g/kg/day, probiotic), *L. gasseri* ( $3 \times 10^6$  CFU/mL/day, probiotic) or FOS+*L. gasseri* (synbiotic) initiated at age of 6 weeks. Data are presented as mean ± SD,  $n = 8$  in each group. No significant difference in one way ANOVA among various groups.

**Supplementary Figure S2: Oral supplements with –biotics restores plasma butyrate level in adult HFD offspring.**

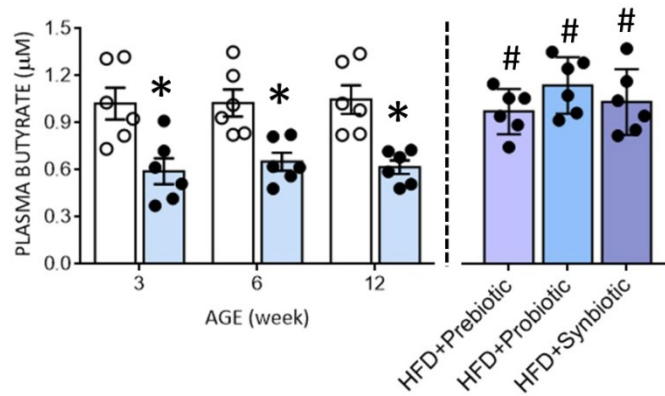

**Figure S2.** Plasma butyrate levels of ND (open circles) or HFD (filled circles) offspring at the age of 3, 6 and 12 weeks, or at 12 weeks after additional oral supplementation of FOS (4 g/kg/day, probiotic), *L. gasseri* ( $3 \times 10^6$  CFU/mL/day, probiotic) or FOS+*L. gasseri* (synbiotic) initiated at the age of 6 weeks. Data are presented as mean  $\pm$  SD,  $n = 6$  in each group. \* $P < 0.05$  vs. ND group, and # $P < 0.05$  vs. HFD group in the post hoc Tucky's multiple-range test.
